# Supplementary material
Source: PubMed Central journal article supplement (PMC3060567)
Supplement: NIHMS267384-supplement-02.pdf [file NIHMS267384-supplement-02.pdf]

| Marker                  | Allele Coding      | CIDI cases  |          |          |               |       |       |       |          |          |               | CIDI controls |       |       |          |          |        |       |        |        |      | CIDI results |  |
|-------------------------|--------------------|-------------|----------|----------|---------------|-------|-------|-------|----------|----------|---------------|---------------|-------|-------|----------|----------|--------|-------|--------|--------|------|--------------|--|
|                         |                    | BP Position | Allele 1 | Allele 2 | Allele counts | N/1/1 | N/1/2 | N/2/2 | freq 1/1 | freq 1/2 | Allele counts | N/1/1         | N/1/2 | N/2/2 | freq 1/1 | freq 1/2 | CHISQ  | P     | OR     |        |      |              |  |
| Anxiety or Depression   | 1 rs28914832       | 2562500     | G        | A        | 0940          | 0     | 0     | 470   | 0.000    | 0.000    | 1.000         | 2/652         | 2     | 325   | 0.000    | 0.006    | 0.994  | 2.878 | 0.0988 | 0.00   |      |              |  |
| Anxiety or Depression   | 2 rs140700         | 2567515     | T        | C        | 15463         | 4     | 79    | 307   | 0.009    | 0.3      | 52/600        | 277           | 0.000 | 0.141 | 0.859    | 0.386    | 0.4389 | 1.16  | 0.3550 | 0.79   |      |              |  |
| Anxiety or Depression   | 3 rs6355           | 2572936     | G        | C        | 25913         | 0     | 25    | 444   | 0.000    | 0.053    | 0.947         | 12/642        | 12    | 315   | 0.000    | 0.037    | 0.963  | 1.170 | 0.2793 | 4.07   |      |              |  |
| Anxiety or Depression   | 4 rs6354           | 2574024     | G        | T        | 162762        | 19    | 124   | 319   | 0.041    | 0.288    | 0.690         | 137/507       | 19    | 99    | 0.059    | 0.307    | 0.634  | 3.441 | 0.0636 | 0.79   |      |              |  |
| Anxiety or Depression   | 5 rs2020939        | 2574858     | A        | G        | 381/557       | 78    | 225   | 166   | 0.166    | 0.480    | 0.354         | 270/384       | 50    | 170   | 0.107    | 0.153    | 0.520  | 3.327 | 0.071  | 0.7903 | 0.97 |              |  |
| Anxiety or Depression   | 6 rs2020940        | 2574940     | G        | A        | 162774        | 17    | 128   | 323   | 0.036    | 0.274    | 0.690         | 141/513       | 17    | 101   | 0.061    | 0.309    | 0.630  | 4.512 | 0.0337 | 0.74   |      |              |  |
| Anxiety or Depression   | 7 rs2066713        | 2575791     | A        | G        | 386/548       | 85    | 216   | 166   | 0.182    | 0.463    | 0.355         | 240/314       | 48    | 144   | 0.134    | 0.147    | 0.442  | 0.411 | 3.280  | 0.701  | 1.21 |              |  |
| Anxiety or Depression   | 8 rs4251417        | 2575984     | T        | C        | 72/868        | 3     | 66    | 401   | 0.006    | 0.140    | 0.853         | 54/596        | 3     | 52    | 0.003    | 0.160    | 0.837  | 0.221 | 0.6381 | 0.92   |      |              |  |
| Anxiety or Depression   | 9 rs2020935        | 2585581     | A        | T        | 49/883        | 2     | 45    | 419   | 0.004    | 0.097    | 0.899         | 41/611        | 1     | 39    | 0.003    | 0.120    | 0.877  | 0.761 | 0.3831 | 0.83   |      |              |  |
| Anxiety or Depression   | 10 rs2020934       | 2585586     | A        | G        | 445/491       | 102   | 241   | 125   | 0.218    | 0.515    | 0.267         | 340/310       | 89    | 162   | 0.274    | 0.274    | 0.498  | 0.228 | 3.484  | 0.0620 | 0.83 |              |  |
| Anxiety or Depression   | 11 HTT LPR         | 2585631     | S        | L        | 382/516       | 82    | 218   | 149   | 0.183    | 0.486    | 0.332         | 306/328       | 72    | 162   | 0.183    | 0.227    | 0.511  | 0.262 | 4.925  | 0.0285 | 0.79 |              |  |
| Anxiety or Depression   | 12 SHITLPR-rs25531 | 2588472     | 2        | 1        | 424/432       | 108   | 208   | 112   | 0.252    | 0.486    | 0.262         | 268/334       | 57    | 154   | 0.189    | 0.152    | 0.299  | 3.564 | 0.0591 | 1.22   |      |              |  |
| Anxiety or Depression   | 13 rs2020930       | 2590167     | T        | C        | 36/898        | 0     | 36    | 431   | 0.000    | 0.077    | 0.923         | 31/623        | 0     | 29    | 0.003    | 0.089    | 0.908  | 0.747 | 0.3875 | 0.81   |      |              |  |
| Anxiety or Depression   | 14 rs7214991       | 2596486     | G        | A        | 361/577       | 71    | 219   | 179   | 0.151    | 0.467    | 0.382         | 223/429       | 44    | 141   | 0.144    | 0.126    | 0.433  | 0.442 | 3.037  | 0.0814 | 1.20 |              |  |
| Anxiety or Depression   | 15 rs1050565       | 2560202     | C        | T        | 304/622       | 53    | 198   | 212   | 0.114    | 0.428    | 0.468         | 184/464       | 29    | 126   | 0.169    | 0.090    | 0.389  | 0.522 | 3.504  | 0.0612 | 1.23 |              |  |
| Anxiety with Depression | 1 rs28914832       | 2562500     | G        | A        | 0376          | 0     | 0     | 298   | 0.000    | 0.000    | 1.000         | 2/652         | 2     | 325   | 0.000    | 0.006    | 0.994  | 1.764 | 0.1841 | 0.00   |      |              |  |
| Anxiety with Depression | 2 rs140700         | 2567515     | T        | C        | 46/350        | 1     | 44    | 243   | 0.003    | 0.153    | 0.844         | 52/600        | 3     | 46    | 0.007    | 0.009    | 0.141  | 0.850 | 0.000  | 0.9945 | 1.00 |              |  |
| Anxiety with Depression | 3 rs6355           | 2572936     | G        | C        | 11/563        | 0     | 11    | 276   | 0.000    | 0.038    | 0.962         | 12/642        | 0     | 12    | 0.000    | 0.037    | 0.963  | 0.011 | 0.1913 | 1.05   |      |              |  |
| Anxiety with Depression | 4 rs6354           | 2574024     | G        | T        | 99/463        | 4     | 75    | 194   | 0.043    | 0.287    | 0.690         | 137/507       | 4     | 99    | 0.059    | 0.307    | 0.634  | 2.551 | 0.1102 | 0.79   |      |              |  |
| Anxiety with Depression | 5 rs2020939        | 2574858     | A        | G        | 228/348       | 48    | 132   | 108   | 0.167    | 0.458    | 0.375         | 270/384       | 50    | 170   | 0.107    | 0.153    | 0.520  | 3.327 | 0.368  | 0.5442 | 0.83 |              |  |
| Anxiety with Depression | 6 rs2020936        | 2574940     | G        | A        | 99/475        | 10    | 79    | 198   | 0.035    | 0.275    | 0.690         | 141/513       | 10    | 101   | 0.061    | 0.309    | 0.630  | 3.615 | 0.0673 | 0.76   |      |              |  |
| Anxiety with Depression | 7 rs2066713        | 2575791     | A        | G        | 243/229       | 55    | 133   | 98    | 0.192    | 0.465    | 0.343         | 240/314       | 48    | 144   | 0.134    | 0.147    | 0.442  | 0.411 | 4.104  | 0.0428 | 1.27 |              |  |
| Anxiety with Depression | 8 rs4251417        | 2575984     | T        | C        | 48/528        | 2     | 44    | 242   | 0.007    | 0.153    | 0.840         | 54/596        | 2     | 52    | 0.003    | 0.160    | 0.837  | 0.000 | 0.9871 | 1.00   |      |              |  |
| Anxiety with Depression | 9 rs2020935        | 2585581     | A        | T        | 33/539        | 2     | 29    | 255   | 0.007    | 0.101    | 0.892         | 41/611        | 1     | 39    | 0.003    | 0.120    | 0.877  | 0.145 | 0.7038 | 0.91   |      |              |  |
| Anxiety with Depression | 10 rs2020934       | 2585586     | A        | G        | 277/299       | 64    | 149   | 75    | 0.222    | 0.517    | 0.280         | 340/310       | 89    | 162   | 0.274    | 0.274    | 0.498  | 0.228 | 2.173  | 0.1405 | 1.18 |              |  |
| Anxiety with Depression | 11 HTT LPR         | 2585631     | S        | L        | 237/319       | 49    | 139   | 90    | 0.176    | 0.500    | 0.324         | 306/328       | 72    | 162   | 0.183    | 0.227    | 0.511  | 0.262 | 3.707  | 0.0114 | 0.80 |              |  |
| Anxiety with Depression | 12 SHITLPR-rs25531 | 2588472     | 2        | 1        | 265/263       | 69    | 127   | 68    | 0.261    | 0.481    | 0.258         | 268/334       | 57    | 154   | 0.189    | 0.152    | 0.299  | 3.630 | 0.0567 | 1.26   |      |              |  |
| Anxiety with Depression | 13 rs2020930       | 2590167     | T        | C        | 25/549        | 0     | 25    | 262   | 0.000    | 0.087    | 0.913         | 31/623        | 0     | 29    | 0.003    | 0.089    | 0.908  | 0.104 | 0.7472 | 0.92   |      |              |  |
| Anxiety with Depression | 14 rs7214991       | 2596486     | G        | A        | 218/565       | 48    | 134   | 111   | 0.146    | 0.467    | 0.428         | 184/464       | 29    | 126   | 0.169    | 0.090    | 0.389  | 0.522 | 3.480  | 0.0592 | 1.18 |              |  |
| Anxiety with Depression | 15 rs1050565       | 2560202     | C        | T        | 180/386       | 31    | 118   | 134   | 0.110    | 0.417    | 0.473         | 184/464       | 29    | 126   | 0.169    | 0.090    | 0.389  | 0.522 | 1.671  | 0.1962 | 1.18 |              |  |
| Depression              | 1 rs28914832       | 2562500     | G        | A        | 0732          | 0     | 0     | 366   | 0.000    | 0.000    | 1.000         | 2/652         | 2     | 325   | 0.000    | 0.006    | 0.994  | 2.242 | 0.1343 | 0.00   |      |              |  |
| Depression              | 2 rs140700         | 2567515     | T        | C        | 173/558       | 4     | 179   | 307   | 0.015    | 0.178    | 0.822         | 52/600        | 3     | 46    | 0.007    | 0.009    | 0.141  | 0.850 | 0.000  | 0.9945 | 1.00 |              |  |
| Depression              | 3 rs6355           | 2572936     | G        | C        | 22/708        | 0     | 22    | 343   | 0.000    | 0.060    | 0.940         | 12/642        | 0     | 12    | 0.000    | 0.037    | 0.963  | 2.000 | 0.1573 | 1.66   |      |              |  |
| Depression              | 4 rs6354           | 2574024     | G        | T        | 128/592       | 14    | 100   | 246   | 0.039    | 0.278    | 0.683         | 137/507       | 19    | 99    | 0.059    | 0.307    | 0.634  | 2.653 | 0.1033 | 0.80   |      |              |  |
| Depression              | 5 rs2020939        | 2574858     | A        | G        | 300/430       | 60    | 180   | 125   | 0.164    | 0.493    | 0.342         | 270/384       | 50    | 170   | 0.107    | 0.153    | 0.520  | 3.327 | 0.005  | 0.9433 | 0.99 |              |  |
| Depression              | 6 rs2020940        | 2574940     | G        | A        | 128/600       | 14    | 100   | 260   | 0.038    | 0.275    | 0.697         | 141/513       | 14    | 101   | 0.061    | 0.309    | 0.630  | 3.476 | 0.0623 | 0.79   |      |              |  |
| Depression              | 7 rs2066713        | 2575791     | A        | G        | 294/432       | 64    | 166   | 133   | 0.176    | 0.457    | 0.366         | 240/314       | 48    | 144   | 0.134    | 0.147    | 0.442  | 0.411 | 1.966  | 0.1608 | 1.17 |              |  |
| Depression              | 8 rs4251417        | 2575984     | T        | C        | 59/673        | 3     | 53    | 310   | 0.008    | 0.145    | 0.847         | 54/596        | 48    | 52    | 0.003    | 0.160    | 0.837  | 0.028 | 0.8669 | 0.97   |      |              |  |
| Depression              | 9 rs2020935        | 2585581     | A        | T        | 37/887        | 2     | 35    | 326   | 0.003    | 0.025    | 0.975         | 41/611        | 1     | 39    | 0.003    | 0.120    | 0.877  | 0.089 | 0.566  | 1.00   |      |              |  |
| Depression              | 10 rs2020934       | 2585586     | A        | G        | 342/386       | 77    | 188   | 99    | 0.212    | 0.516    | 0.272         | 340/310       | 72    | 162   | 0.274    | 0.274    | 0.498  | 0.228 | 3.902  | 0.0482 | 0.81 |              |  |
| Depression              | 11 HTT LPR         | 2585631     | S        | L        | 287/411       | 61    | 165   | 123   | 0.175    | 0.473    | 0.352         | 306/328       | 89    | 162   | 0.183    | 0.227    | 0.511  | 0.262 | 6.872  | 0.0088 | 0.75 |              |  |
| Depression              | 12 SHITLPR-rs25531 | 2588472     | 2        | 1        | 336/323       | 85    | 263   | 105   | 0.254    | 0.484    | 0.262         | 268/334       | 57    | 154   | 0.189    | 0.152    | 0.299  | 4.489 | 0.0345 | 1.27   |      |              |  |
| Depression              | 13 rs2020930       | 2590167     | T        | C        | 28/700        | 0     | 28    | 336   | 0.000    | 0.077    | 0.923         | 31/623        | 0     | 29    | 0.003    | 0.089    | 0.908  | 0.674 | 0.4118 | 0.80   |      |              |  |
| Depression              | 14 rs7214991       | 2596486     | G        | A        | 288/442       | 57    | 174   | 134   | 0.156    | 0.477    | 0.367         | 223/429       | 44    | 141   | 0.144    | 0.126    | 0.433  | 0.442 | 4.073  | 0.0436 | 1.25 |              |  |
| Depression              | 15 rs1050565       | 2560202     | C        | T        | 245/473       | 45    | 155   | 159   | 0.125    | 0.432    | 0.443         | 184/464       | 29    | 126   | 0.169    | 0.090    | 0.389  | 0.522 | 3.187  | 0.0228 | 1.31 |              |  |
| Anxiety with Depression | 1 rs28914832       | 2562500     | G        | A        | 0376          | 0     | 0     | 298   | 0.000    | 0.000    | 1.000         | 2/652         | 2     | 325   | 0.000    | 0.006    | 0.994  | 1.128 | 0.2983 | 0.00   |      |              |  |
| Anxiety with Depression | 2 rs140700         | 2567515     | T        | C        | 32/336        | 1     | 30    | 153   | 0.005    | 0.163    | 0.832         | 52/600        | 3     | 46    | 0.007    | 0.009    | 0.141  | 0.850 | 0.161  | 0.6878 | 1.10 |              |  |
| Anxiety with Depression | 3 rs6355           | 2572936     | G        | C        | 8/358         | 0     | 8     | 175   | 0.000    | 0.044    | 0.956         | 12/642        | 0     | 12    | 0.000    | 0.037    | 0.963  | 0.150 | 0.6982 | 1.20   |      |              |  |
| Anxiety with Depression | 4 rs6354           | 2574024     | G        | T        | 65/293        | 7     | 51    | 121   | 0.038    | 0.276    | 0.683         | 137/507       | 7     | 99    | 0.059    | 0.307    | 0.634  | 1.909 | 0.2386 | 0.82   |      |              |  |
| Anxiety with Depression | 5 rs2020939        | 2574858     | A        | G        | 147/221       | 30    | 87    | 67    | 0.163    | 0.473    | 0.364         | 270/384       | 50    | 170   | 0.107    | 0.153    | 0.520  | 3.327 | 0.175  | 0.6759 | 0.95 |              |  |
| Anxiety with Depression | 6 rs2020936        | 2574940     | G        | A        | 65/301        | 7     | 51    | 125   | 0.038    | 0.278    | 0.683         | 141/513       | 7     | 101   | 0.061    | 0.309    | 0.630  | 2.103 | 0.1471 | 0.79   |      |              |  |
| Anxiety with Depression | 7 rs2066713        | 2575791     | A        | G        | 150/213       | 34    | 83    | 65    | 0.167    | 0.456    | 0.367         | 240/314       | 48    | 144   | 0.134    | 0.147    | 0.442  | 0.411 | 2.145  | 0.211  | 1.22 |              |  |
| Anxiety with Depression | 8 rs4251417        | 2575984     | T        | C        | 35/333        | 2     | 31    | 151   | 0.011    | 0.169    | 0.831         | 54/596        | 1     | 52    | 0.003    | 0.160    | 0.837  | 0.426 | 0.5138 | 1.16   |      |              |  |
| Anxiety with Depression | 9 rs2020935        | 2585581     | A        | T        | 21/343        | 1     | 19    |       |          |          |               |               |       |       |          |          |        |       |        |        |      |              |  |

| SSAGA cases   |       |       |       |          |          | SSAGA controls |               |       |       |       |          | SSAGA results |          |       |        |      |
|---------------|-------|-------|-------|----------|----------|----------------|---------------|-------|-------|-------|----------|---------------|----------|-------|--------|------|
| Allele counts | N/1/1 | N/1/2 | N/2/2 | freq 1/1 | freq 1/2 | freq 2/2       | Allele counts | N/1/1 | N/1/2 | N/2/2 | freq 1/1 | freq 1/2      | freq 2/2 | CHISQ | P      | OR   |
| 3/1377        | 0     | 3     | 687   | 0.000    | 0.004    | 0.996          | 1/1447        | 0     | 1     | 723   | 0.000    | 0.001         | 0.999    | 1.101 | 0.2941 | 3.15 |
| 156/1226      | 12    | 132   | 847   | 0.017    | 0.191    | 0.792          | 153/1295      | 9     | 135   | 580   | 0.012    | 0.186         | 0.801    | 0.379 | 0.5363 | 1.08 |
| 34/1348       | 0     | 34    | 657   | 0.000    | 0.049    | 0.951          | 25/1423       | 0     | 25    | 699   | 0.000    | 0.035         | 0.965    | 1.865 | 0.1721 | 1.44 |
| 272/1106      | 39    | 194   | 456   | 0.057    | 0.282    | 0.662          | 315/1129      | 30    | 255   | 437   | 0.042    | 0.353         | 0.605    | 1.844 | 0.1745 | 0.88 |
| 593/789       | 136   | 321   | 234   | 0.197    | 0.485    | 0.339          | 556/886       | 107   | 342   | 272   | 0.148    | 0.474         | 0.377    | 5.536 | 0.0186 | 1.20 |
| 274/1108      | 40    | 194   | 456   | 0.058    | 0.281    | 0.661          | 311/1135      | 29    | 253   | 441   | 0.040    | 0.350         | 0.610    | 1.175 | 0.2784 | 0.90 |
| 513/869       | 101   | 311   | 279   | 0.146    | 0.450    | 0.404          | 572/876       | 107   | 358   | 259   | 0.148    | 0.494         | 0.358    | 1.698 | 0.1925 | 0.90 |
| 120/1250      | 6     | 108   | 571   | 0.009    | 0.158    | 0.834          | 121/1301      | 4     | 113   | 594   | 0.006    | 0.159         | 0.835    | 0.055 | 0.8141 | 1.03 |
| 96/1290       | 7     | 62    | 599   | 0.010    | 0.119    | 0.871          | 101/1343      | 4     | 93    | 625   | 0.006    | 0.129         | 0.866    | 0.000 | 0.9853 | 1.00 |
| 672/692       | 169   | 334   | 179   | 0.248    | 0.490    | 0.262          | 664/756       | 155   | 354   | 201   | 0.218    | 0.499         | 0.283    | 1.751 | 0.1858 | 1.11 |
| 602/760       | 134   | 334   | 213   | 0.197    | 0.490    | 0.313          | 595/823       | 120   | 355   | 234   | 0.169    | 0.501         | 0.330    | 1.421 | 0.2333 | 1.10 |
| 658/696       | 161   | 336   | 180   | 0.239    | 0.496    | 0.266          | 710/696       | 172   | 365   | 165   | 0.245    | 0.521         | 0.235    | 0.997 | 0.3190 | 0.93 |
| 53/1329       | 1     | 51    | 639   | 0.001    | 0.074    | 0.925          | 53/1395       | 0     | 53    | 671   | 0.000    | 0.073         | 0.927    | 0.060 | 0.8086 | 1.05 |
| 523/857       | 103   | 317   | 270   | 0.149    | 0.459    | 0.391          | 562/884       | 105   | 352   | 266   | 0.145    | 0.487         | 0.368    | 0.279 | 0.5971 | 0.96 |
| 454/926       | 80    | 294   | 316   | 0.116    | 0.426    | 0.458          | 490/954       | 79    | 332   | 311   | 0.109    | 0.460         | 0.431    | 0.340 | 0.5690 | 0.95 |
| 1/963         | 0     | 1     | 184   | 0.000    | 0.005    | 0.995          | 1/1447        | 0     | 1     | 723   | 0.000    | 0.001         | 0.999    | 1.096 | 0.2974 | 3.52 |
| 39/331        | 2     | 35    | 148   | 0.011    | 0.189    | 0.800          | 153/1295      | 9     | 135   | 580   | 0.012    | 0.186         | 0.801    | 0.000 | 0.9885 | 1.00 |
| 7/363         | 0     | 7     | 178   | 0.000    | 0.038    | 0.962          | 25/1423       | 0     | 25    | 699   | 0.000    | 0.035         | 0.965    | 0.047 | 0.8291 | 1.10 |
| 65/303        | 8     | 49    | 127   | 0.043    | 0.266    | 0.690          | 315/1129      | 30    | 255   | 437   | 0.042    | 0.353         | 0.605    | 3.049 | 0.0806 | 0.77 |
| 159/211       | 34    | 91    | 60    | 0.184    | 0.492    | 0.324          | 556/886       | 107   | 342   | 272   | 0.148    | 0.474         | 0.377    | 2.403 | 0.1211 | 1.20 |
| 64/306        | 8     | 48    | 129   | 0.043    | 0.259    | 0.697          | 311/1135      | 29    | 253   | 441   | 0.040    | 0.350         | 0.610    | 3.187 | 0.0742 | 0.76 |
| 146/224       | 27    | 92    | 66    | 0.146    | 0.497    | 0.357          | 572/876       | 107   | 358   | 259   | 0.148    | 0.494         | 0.358    | 0.000 | 0.9879 | 1.00 |
| 37/327        | 3     | 31    | 148   | 0.016    | 0.170    | 0.813          | 121/1301      | 4     | 113   | 594   | 0.006    | 0.159         | 0.835    | 0.985 | 0.3209 | 1.22 |
| 15/355        | 1     | 13    | 171   | 0.005    | 0.070    | 0.924          | 101/1343      | 4     | 93    | 625   | 0.006    | 0.129         | 0.866    | 4.254 | 0.0392 | 0.56 |
| 180/184       | 41    | 98    | 43    | 0.225    | 0.538    | 0.236          | 664/756       | 155   | 354   | 201   | 0.218    | 0.499         | 0.283    | 0.841 | 0.3591 | 1.11 |
| 161/209       | 95    | 99    | 26    | 0.306    | 0.550    | 0.144          | 595/823       | 120   | 355   | 234   | 0.169    | 0.501         | 0.330    | 0.000 | 0.9966 | 1.00 |
| 179/181       | 40    | 99    | 41    | 0.222    | 0.550    | 0.228          | 710/696       | 172   | 366   | 165   | 0.245    | 0.521         | 0.235    | 0.069 | 0.7928 | 1.03 |
| 4/366         | 0     | 4     | 181   | 0.000    | 0.022    | 0.978          | 53/1395       | 0     | 53    | 671   | 0.000    | 0.073         | 0.927    | 6.455 | 0.0111 | 0.29 |
| 143/227       | 29    | 85    | 71    | 0.157    | 0.459    | 0.384          | 562/884       | 105   | 352   | 266   | 0.145    | 0.487         | 0.368    | 0.066 | 0.4487 | 0.94 |
| 136/234       | 27    | 82    | 76    | 0.146    | 0.443    | 0.411          | 490/954       | 79    | 332   | 311   | 0.109    | 0.460         | 0.431    | 1.039 | 0.3081 | 1.13 |
| 2/1170        | 0     | 2     | 584   | 0.000    | 0.003    | 0.997          | 1/1447        | 0     | 1     | 723   | 0.000    | 0.001         | 0.999    | 0.585 | 0.4446 | 2.47 |
| 133/1041      | 10    | 113   | 864   | 0.017    | 0.139    | 0.790          | 153/1295      | 9     | 135   | 580   | 0.012    | 0.186         | 0.801    | 0.368 | 0.5804 | 1.08 |
| 30/1144       | 0     | 30    | 557   | 0.000    | 0.051    | 0.949          | 25/1423       | 0     | 25    | 699   | 0.000    | 0.035         | 0.965    | 2.169 | 0.1408 | 1.46 |
| 232/938       | 35    | 162   | 388   | 0.060    | 0.277    | 0.663          | 315/1129      | 30    | 255   | 437   | 0.042    | 0.353         | 0.605    | 1.540 | 0.2147 | 0.89 |
| 502/672       | 115   | 272   | 200   | 0.196    | 0.463    | 0.341          | 556/886       | 107   | 342   | 272   | 0.148    | 0.474         | 0.377    | 4.744 | 0.0294 | 1.19 |
| 234/938       | 36    | 162   | 388   | 0.061    | 0.276    | 0.662          | 311/1135      | 29    | 253   | 441   | 0.040    | 0.350         | 0.610    | 0.933 | 0.3340 | 0.91 |
| 435/739       | 89    | 257   | 241   | 0.152    | 0.438    | 0.411          | 572/876       | 107   | 358   | 259   | 0.148    | 0.494         | 0.358    | 1.645 | 0.1996 | 0.90 |
| 97/1071       | 3     | 91    | 490   | 0.005    | 0.156    | 0.839          | 121/1301      | 4     | 113   | 594   | 0.006    | 0.159         | 0.835    | 0.035 | 0.8521 | 0.97 |
| 83/1095       | 6     | 71    | 607   | 0.010    | 0.122    | 0.868          | 101/1343      | 4     | 93    | 625   | 0.006    | 0.129         | 0.866    | 0.012 | 0.9117 | 1.03 |
| 567/595       | 141   | 285   | 155   | 0.243    | 0.491    | 0.267          | 664/756       | 155   | 354   | 201   | 0.218    | 0.499         | 0.283    | 1.060 | 0.3031 | 1.09 |
| 516/642       | 118   | 280   | 181   | 0.204    | 0.484    | 0.313          | 595/823       | 120   | 355   | 234   | 0.169    | 0.501         | 0.330    | 1.756 | 0.1852 | 1.11 |
| 553/597       | 136   | 281   | 158   | 0.237    | 0.489    | 0.275          | 710/696       | 172   | 366   | 165   | 0.245    | 0.521         | 0.235    | 1.471 | 0.2552 | 0.91 |
| 49/1125       | 1     | 47    | 539   | 0.002    | 0.080    | 0.918          | 53/1395       | 0     | 53    | 671   | 0.000    | 0.073         | 0.927    | 0.457 | 0.4989 | 1.15 |
| 443/729       | 85    | 273   | 228   | 0.145    | 0.466    | 0.389          | 562/884       | 105   | 352   | 266   | 0.145    | 0.487         | 0.368    | 0.312 | 0.5766 | 0.96 |
| 38/1791       | 64    | 253   | 289   | 0.109    | 0.432    | 0.459          | 490/954       | 79    | 332   | 311   | 0.109    | 0.460         | 0.431    | 0.592 | 0.4418 | 0.94 |
| 0/162         | 0     | 0     | 81    | 0.000    | 0.000    | 1.000          | 1/1447        | 0     | 1     | 723   | 0.000    | 0.001         | 0.999    | 0.112 | 0.7379 | 0.03 |
| 16/146        | 0     | 16    | 65    | 0.000    | 0.198    | 0.802          | 153/1295      | 9     | 135   | 580   | 0.012    | 0.186         | 0.801    | 0.074 | 0.7859 | 0.93 |
| 3/159         | 0     | 3     | 78    | 0.000    | 0.037    | 0.963          | 25/1423       | 0     | 25    | 699   | 0.000    | 0.035         | 0.965    | 0.013 | 0.9079 | 1.07 |
| 25/135        | 4     | 17    | 59    | 0.050    | 0.213    | 0.738          | 315/1129      | 30    | 255   | 437   | 0.042    | 0.353         | 0.605    | 3.303 | 0.0691 | 0.66 |
| 68/94         | 13    | 42    | 26    | 0.160    | 0.519    | 0.321          | 556/886       | 107   | 342   | 272   | 0.148    | 0.474         | 0.377    | 0.716 | 0.3975 | 1.15 |
| 24/138        | 4     | 16    | 61    | 0.049    | 0.198    | 0.753          | 311/1135      | 29    | 253   | 441   | 0.040    | 0.350         | 0.610    | 3.956 | 0.0467 | 0.63 |
| 69/94         | 15    | 38    | 26    | 0.185    | 0.469    | 0.346          | 572/876       | 107   | 358   | 259   | 0.148    | 0.494         | 0.358    | 0.372 | 0.5420 | 1.11 |
| 14/148        | 0     | 14    | 67    | 0.000    | 0.173    | 0.827          | 121/1301      | 4     | 113   | 594   | 0.006    | 0.159         | 0.835    | 0.003 | 0.9542 | 1.02 |
| 2/160         | 0     | 2     | 79    | 0.000    | 0.025    | 0.975          | 101/1343      | 4     | 93    | 625   | 0.006    | 0.129         | 0.866    | 8.051 | 0.0045 | 0.17 |
| 75/87         | 13    | 49    | 19    | 0.160    | 0.605    | 0.235          | 664/756       | 155   | 354   | 201   | 0.218    | 0.499         | 0.283    | 0.013 | 0.9107 | 0.98 |
| 65/91         | 10    | 45    | 23    | 0.128    | 0.577    | 0.295          | 595/823       | 120   | 355   | 234   | 0.169    | 0.501         | 0.330    | 0.005 | 0.9437 | 0.99 |
| 74/82         | 15    | 44    | 19    | 0.192    | 0.564    | 0.244          | 710/696       | 172   | 366   | 165   | 0.245    | 0.521         | 0.235    | 0.527 | 0.4680 | 1.13 |
| 0/162         | 0     | 0     | 81    | 0.000    | 0.000    | 1.000          | 53/1395       | 0     | 53    | 671   | 0.000    | 0.073         | 0.927    | 6.131 | 0.0133 | 0.00 |
| 63/99         | 11    | 41    | 29    | 0.136    | 0.506    | 0.358          | 562/884       | 105   | 352   | 266   | 0.145    | 0.487         | 0.368    | 0.000 | 0.9954 | 1.00 |
| 63/99         | 11    | 41    | 29    | 0.136    | 0.506    | 0.358          | 490/954       | 79    | 332   | 311   | 0.109    | 0.460         | 0.431    | 1.584 | 0.2081 | 1.24 |
| 0/166         | 0     | 0     | 83    | 0.000    | 0.000    | 1.000          | 1/1447        | 0     | 1     | 723   | 0.000    | 0.001         | 0.999    | 0.115 | 0.7348 | 0.00 |
| 16/151        | 2     | 11    | 70    | 0.024    | 0.133    | 0.843          | 153/1295      | 9     | 135   | 580   | 0.012    | 0.186         | 0.801    | 0.374 | 0.5409 | 0.84 |
| 6/160         | 0     | 6     | 77    | 0.000    | 0.072    | 0.928          | 25/1423       | 0     | 25    | 699   | 0.000    | 0.035         | 0.965    | 2.818 | 0.0932 | 2.14 |
| 23/139        | 3     | 17    | 61    | 0.037    | 0.210    | 0.753          | 315/1129      | 30    | 255   | 437   | 0.042    | 0.353         | 0.605    | 5.086 | 0.0241 | 0.59 |
| 76/90         | 19    | 38    | 26    | 0.229    | 0.458    | 0.313          | 556/886       | 107   | 342   | 272   | 0.148    | 0.474         | 0.377    | 3.258 | 0.0711 | 1.35 |
| 24/142        | 3     | 18    | 62    | 0.036    | 0.217    | 0.747          | 311/1135      | 29    | 253   | 441   | 0.040    | 0.350         | 0.610    | 4.495 | 0.0340 | 0.62 |
| 65/101        | 16    | 33    | 34    | 0.193    | 0.398    | 0.410          | 572/876       | 107   | 358   | 259   | 0.148    | 0.494         | 0.358    | 0.007 | 0.9311 | 0.99 |
| 17/147        | 0     | 17    | 65    | 0.000    | 0.207    | 0.793          | 121/1301      | 4     | 113   | 594   | 0.006    | 0.159         | 0.835    | 0.638 | 0.4244 | 1.24 |
| 10/152        | 0     | 10    | 71    | 0.000    | 0.123    | 0.877          | 101/1343      | 4     | 93    | 625   | 0.006    | 0.129         | 0.866    | 0.153 | 0.6956 | 0.87 |
| 79/85         | 20    | 39    | 23    | 0.244    | 0.476    | 0.280          | 664/756       | 155   | 354   | 201   | 0.218    | 0.499         | 0.283    | 0.117 | 0.7319 | 1.06 |
| 67/97         | 11    | 45    | 26    | 0.134    | 0.549    | 0.317          | 595/823       | 120   | 355   | 234   | 0.169    | 0.501         | 0.330    | 0.074 | 0.7856 | 0.96 |
| 85/79         | 18    | 49    | 15    | 0.220    | 0.598    | 0.163          | 710/696       | 172   | 366   | 165   | 0.245    | 0.521         | 0.235    | 0.104 | 0.7469 | 0.95 |
| 6/160         | 0     | 6     | 77    | 0.000    | 0.072    | 0.928          | 53/1395       | 0     | 53    | 671   | 0.000    | 0.073         | 0.927    | 0.001 | 0.9763 | 0.99 |
| 66/100        | 13    | 40    | 30    | 0.157    | 0.482    | 0.361          | 562/884       | 105   | 352   | 266   | 0.145    | 0.487         | 0.368    | 0.050 | 0.8231 | 1.04 |
| 59/107        | 12    |       |       |          |          |                |               |       |       |       |          |               |          |       |        |      |

| Combined CIDU-SSAGA cases |     |     |      |       |       |       |          |          |          | Combined CIDU-SSAGA controls |     |     |      |       |       |       |          |          |          | Combined results |        |      |
|---------------------------|-----|-----|------|-------|-------|-------|----------|----------|----------|------------------------------|-----|-----|------|-------|-------|-------|----------|----------|----------|------------------|--------|------|
| Allele counts             | N   | 1/1 | N    | 1/2   | N     | 2/2   | freq 1/1 | freq 1/2 | freq 2/2 | Allele counts                | N   | 1/1 | N    | 1/2   | N     | 2/2   | freq 1/1 | freq 1/2 | freq 2/2 | CHISQ            | P      | OR   |
| 3/2317                    | 0   | 3   | 1157 | 0.000 | 0.003 | 0.997 |          |          |          | 3/2099                       | 0   | 3   | 1048 | 0.000 | 0.003 | 0.997 |          |          |          | 0.015            | 0.9037 | 0.91 |
| 243/2079                  | 161 | 211 | 334  | 0.014 | 0.142 | 0.844 | 0.068    | 0.110    | 0.822    | 205/1895                     | 12  | 181 | 857  | 0.011 | 0.172 | 0.816 | 0.035    | 0.965    | 0.965    | 0.598            | 0.4392 | 1.08 |
| 59/2261                   | 0   | 59  | 1101 | 0.000 | 0.051 | 0.949 |          |          |          | 37/2065                      | 0   | 37  | 1014 | 0.000 | 0.035 | 0.965 |          |          |          | 3.182            | 0.0744 | 1.46 |
| 434/1868                  | 58  | 318 | 775  | 0.050 | 0.276 | 0.673 | 0.031    | 0.148    | 0.821    | 452/1636                     | 49  | 354 | 641  | 0.047 | 0.339 | 0.614 | 0.039    | 0.614    | 0.614    | 5.307            | 0.0212 | 0.84 |
| 974/1346                  | 214 | 546 | 400  | 0.184 | 0.471 | 0.345 | 0.184    | 0.471    | 0.345    | 826/1270                     | 157 | 512 | 379  | 0.150 | 0.489 | 0.362 | 0.150    | 0.489    | 0.362    | 3.022            | 0.0821 | 1.11 |
| 436/1880                  | 57  | 322 | 779  | 0.049 | 0.278 | 0.673 | 0.031    | 0.148    | 0.821    | 452/1648                     | 49  | 354 | 647  | 0.047 | 0.337 | 0.616 | 0.039    | 0.616    | 0.616    | 4.991            | 0.0295 | 0.83 |
| 899/1417                  | 186 | 527 | 445  | 0.161 | 0.455 | 0.384 | 0.161    | 0.455    | 0.384    | 812/1288                     | 155 | 502 | 393  | 0.148 | 0.478 | 0.374 | 0.148    | 0.478    | 0.374    | 0.010            | 0.9185 | 1.01 |
| 192/2118                  | 9   | 174 | 972  | 0.008 | 0.151 | 0.842 | 0.008    | 0.151    | 0.842    | 175/1897                     | 5   | 165 | 866  | 0.005 | 0.159 | 0.836 | 0.005    | 0.159    | 0.836    | 0.026            | 0.8727 | 0.98 |
| 145/2163                  | 9   | 127 | 1018 | 0.008 | 0.110 | 0.882 | 0.008    | 0.110    | 0.882    | 142/1954                     | 5   | 132 | 911  | 0.005 | 0.126 | 0.869 | 0.005    | 0.126    | 0.869    | 0.437            | 0.5996 | 0.92 |
| 1117/1183                 | 271 | 575 | 304  | 0.236 | 0.500 | 0.264 | 0.236    | 0.500    | 0.264    | 1004/1066                    | 244 | 516 | 275  | 0.236 | 0.499 | 0.266 | 0.236    | 0.499    | 0.266    | 0.002            | 0.9669 | 1.00 |
| 984/1276                  | 216 | 552 | 362  | 0.191 | 0.488 | 0.320 | 0.191    | 0.488    | 0.320    | 901/1151                     | 192 | 517 | 317  | 0.187 | 0.504 | 0.309 | 0.187    | 0.504    | 0.309    | 0.059            | 0.8075 | 0.99 |
| 1032/1128                 | 269 | 544 | 292  | 0.243 | 0.492 | 0.264 | 0.243    | 0.492    | 0.264    | 978/1030                     | 229 | 520 | 255  | 0.228 | 0.518 | 0.254 | 0.228    | 0.518    | 0.254    | 0.027            | 0.8690 | 1.01 |
| 89/2227                   | 1   | 87  | 1070 | 0.001 | 0.075 | 0.924 |          |          |          | 84/2018                      | 1   | 82  | 988  | 0.001 | 0.078 | 0.921 |          |          |          | 0.069            | 0.7930 | 0.96 |
| 884/1434                  | 174 | 536 | 449  | 0.150 | 0.462 | 0.387 | 0.150    | 0.462    | 0.387    | 785/1313                     | 146 | 493 | 410  | 0.139 | 0.470 | 0.391 | 0.139    | 0.470    | 0.391    | 0.243            | 0.6223 | 1.03 |
| 758/1548                  | 133 | 492 | 528  | 0.115 | 0.427 | 0.458 | 0.115    | 0.427    | 0.458    | 674/1418                     | 108 | 458 | 480  | 0.103 | 0.438 | 0.459 | 0.103    | 0.438    | 0.459    | 0.213            | 0.6445 | 1.03 |
| 1945                      | 0   | 1   | 472  | 0.000 | 0.002 | 0.998 |          |          |          | 3/2099                       | 0   | 3   | 1048 | 0.000 | 0.003 | 0.997 |          |          |          | 0.068            | 0.7940 | 0.74 |
| 85/861                    | 3   | 79  | 391  | 0.006 | 0.167 | 0.827 | 0.006    | 0.167    | 0.827    | 205/1895                     | 12  | 181 | 857  | 0.011 | 0.172 | 0.816 | 0.011    | 0.172    | 0.816    | 0.457            | 0.4991 | 0.91 |
| 18/926                    | 0   | 18  | 454  | 0.000 | 0.038 | 0.962 |          |          |          | 37/2065                      | 0   | 37  | 1014 | 0.000 | 0.035 | 0.965 |          |          |          | 0.079            | 0.7788 | 1.09 |
| 164/766                   | 20  | 124 | 321  | 0.043 | 0.267 | 0.690 | 0.043    | 0.267    | 0.690    | 452/1636                     | 49  | 354 | 641  | 0.047 | 0.339 | 0.614 | 0.047    | 0.339    | 0.614    | 8.379            | 0.0116 | 0.77 |
| 387/559                   | 82  | 223 | 168  | 0.173 | 0.471 | 0.355 | 0.173    | 0.471    | 0.355    | 826/1270                     | 157 | 512 | 379  | 0.150 | 0.489 | 0.362 | 0.150    | 0.489    | 0.362    | 0.612            | 0.4339 | 1.06 |
| 163/781                   | 18  | 127 | 327  | 0.038 | 0.269 | 0.693 | 0.038    | 0.269    | 0.693    | 452/1648                     | 49  | 354 | 647  | 0.047 | 0.337 | 0.616 | 0.039    | 0.616    | 0.616    | 7.320            | 0.0088 | 0.76 |
| 389/553                   | 82  | 225 | 164  | 0.174 | 0.478 | 0.348 | 0.174    | 0.478    | 0.348    | 812/1288                     | 155 | 502 | 393  | 0.148 | 0.478 | 0.374 | 0.148    | 0.478    | 0.374    | 1.880            | 0.1703 | 1.12 |
| 85/855                    | 5   | 78  | 390  | 0.011 | 0.180 | 0.830 | 0.011    | 0.180    | 0.830    | 175/1897                     | 5   | 165 | 866  | 0.005 | 0.159 | 0.836 | 0.005    | 0.159    | 0.836    | 0.292            | 0.5891 | 1.08 |
| 48/894                    | 3   | 42  | 426  | 0.006 | 0.089 | 0.904 | 0.006    | 0.089    | 0.904    | 142/1954                     | 5   | 132 | 911  | 0.005 | 0.126 | 0.869 | 0.005    | 0.126    | 0.869    | 3.128            | 0.0771 | 0.74 |
| 457/483                   | 105 | 247 | 118  | 0.223 | 0.526 | 0.251 | 0.223    | 0.526    | 0.251    | 1004/1066                    | 244 | 516 | 275  | 0.236 | 0.499 | 0.266 | 0.236    | 0.499    | 0.266    | 0.003            | 0.9535 | 1.01 |
| 388/528                   | 75  | 238 | 145  | 0.164 | 0.520 | 0.317 | 0.164    | 0.520    | 0.317    | 901/1151                     | 192 | 517 | 317  | 0.187 | 0.504 | 0.309 | 0.187    | 0.504    | 0.309    | 0.620            | 0.4392 | 1.04 |
| 444/444                   | 109 | 226 | 109  | 0.245 | 0.509 | 0.245 | 0.245    | 0.509    | 0.245    | 978/1030                     | 229 | 520 | 255  | 0.228 | 0.518 | 0.254 | 0.228    | 0.518    | 0.254    | 0.413            | 0.5204 | 1.05 |
| 29/915                    | 0   | 29  | 443  | 0.000 | 0.061 | 0.939 |          |          |          | 84/2018                      | 1   | 82  | 988  | 0.001 | 0.078 | 0.921 |          |          |          | 1.558            | 0.2120 | 0.76 |
| 361/583                   | 71  | 119 | 462  | 0.150 | 0.464 | 0.386 | 0.150    | 0.464    | 0.386    | 785/1313                     | 146 | 493 | 410  | 0.139 | 0.470 | 0.391 | 0.139    | 0.470    | 0.391    | 0.189            | 0.7029 | 1.04 |
| 316/620                   | 58  | 200 | 210  | 0.124 | 0.427 | 0.449 | 0.124    | 0.427    | 0.449    | 674/1418                     | 108 | 458 | 480  | 0.103 | 0.438 | 0.459 | 0.103    | 0.438    | 0.459    | 0.699            | 0.4030 | 1.07 |
| 21/902                    | 0   | 2   | 950  | 0.000 | 0.002 | 0.998 |          |          |          | 3/2099                       | 0   | 3   | 1048 | 0.000 | 0.003 | 0.997 |          |          |          | 0.114            | 0.7359 | 0.74 |
| 283/1700                  | 14  | 170 | 751  | 0.015 | 0.197 | 0.788 | 0.015    | 0.197    | 0.788    | 205/1895                     | 12  | 181 | 857  | 0.011 | 0.172 | 0.816 | 0.011    | 0.172    | 0.816    | 1.088            | 0.0529 | 1.12 |
| 52/1852                   | 0   | 52  | 900  | 0.000 | 0.055 | 0.945 |          |          |          | 37/2065                      | 0   | 37  | 1014 | 0.000 | 0.035 | 0.965 |          |          |          | 4.335            | 0.0373 | 1.57 |
| 360/1530                  | 49  | 262 | 634  | 0.052 | 0.277 | 0.671 | 0.052    | 0.277    | 0.671    | 452/1636                     | 49  | 354 | 641  | 0.047 | 0.339 | 0.614 | 0.047    | 0.339    | 0.614    | 4.128            | 0.0422 | 0.85 |
| 802/1102                  | 175 | 452 | 325  | 0.184 | 0.475 | 0.341 | 0.184    | 0.475    | 0.341    | 826/1270                     | 157 | 512 | 379  | 0.150 | 0.489 | 0.362 | 0.150    | 0.489    | 0.362    | 3.044            | 0.0811 | 1.12 |
| 362/1538                  | 50  | 292 | 638  | 0.053 | 0.276 | 0.672 | 0.053    | 0.276    | 0.672    | 452/1648                     | 49  | 354 | 647  | 0.047 | 0.337 | 0.616 | 0.039    | 0.616    | 0.616    | 3.758            | 0.0268 | 0.86 |
| 728/1171                  | 153 | 423 | 374  | 0.161 | 0.445 | 0.394 | 0.161    | 0.445    | 0.394    | 812/1288                     | 155 | 502 | 393  | 0.148 | 0.478 | 0.374 | 0.148    | 0.478    | 0.374    | 0.037            | 0.8465 | 0.99 |
| 158/1744                  | 6   | 144 | 800  | 0.006 | 0.152 | 0.842 | 0.006    | 0.152    | 0.842    | 175/1897                     | 5   | 165 | 866  | 0.005 | 0.159 | 0.836 | 0.005    | 0.159    | 0.836    | 0.072            | 0.7986 | 0.97 |
| 123/1772                  | 7   | 106 | 833  | 0.007 | 0.112 | 0.881 | 0.007    | 0.112    | 0.881    | 142/1954                     | 5   | 132 | 911  | 0.005 | 0.126 | 0.869 | 0.005    | 0.126    | 0.869    | 0.006            | 0.9666 | 1.00 |
| 908/981                   | 218 | 473 | 254  | 0.231 | 0.501 | 0.269 | 0.231    | 0.501    | 0.269    | 1004/1066                    | 244 | 516 | 275  | 0.236 | 0.499 | 0.266 | 0.236    | 0.499    | 0.266    | 0.066            | 0.7979 | 0.98 |
| 803/1053                  | 179 | 445 | 304  | 0.193 | 0.480 | 0.328 | 0.193    | 0.480    | 0.328    | 901/1151                     | 192 | 517 | 317  | 0.187 | 0.504 | 0.309 | 0.187    | 0.504    | 0.309    | 0.164            | 0.6855 | 0.97 |
| 891/929                   | 224 | 443 | 243  | 0.246 | 0.487 | 0.267 | 0.246    | 0.487    | 0.267    | 978/1030                     | 229 | 520 | 255  | 0.228 | 0.518 | 0.254 | 0.228    | 0.518    | 0.254    | 0.027            | 0.8768 | 1.01 |
| 77/1825                   | 1   | 75  | 875  | 0.001 | 0.079 | 0.920 |          |          |          | 84/2018                      | 1   | 82  | 988  | 0.001 | 0.078 | 0.921 |          |          |          | 0.007            | 0.8531 | 1.01 |
| 731/1171                  | 142 | 447 | 362  | 0.149 | 0.470 | 0.381 | 0.149    | 0.470    | 0.381    | 785/1313                     | 146 | 493 | 410  | 0.139 | 0.470 | 0.391 | 0.139    | 0.470    | 0.391    | 0.438            | 0.5080 | 1.04 |
| 626/1264                  | 109 | 408 | 428  | 0.115 | 0.432 | 0.453 | 0.115    | 0.432    | 0.453    | 674/1418                     | 108 | 458 | 480  | 0.103 | 0.438 | 0.459 | 0.103    | 0.438    | 0.459    | 0.369            | 0.5437 | 1.04 |
| 0/330                     | 0   | 0   | 265  | 0.000 | 0.000 | 1.000 |          |          |          | 3/2099                       | 0   | 3   | 1048 | 0.000 | 0.003 | 0.997 |          |          |          | 0.757            | 0.3842 | 0.00 |
| 48/482                    | 1   | 46  | 218  | 0.004 | 0.174 | 0.823 | 0.004    | 0.174    | 0.823    | 205/1895                     | 12  | 181 | 857  | 0.011 | 0.172 | 0.816 | 0.011    | 0.172    | 0.816    | 0.242            | 0.6227 | 0.92 |
| 11/517                    | 0   | 11  | 253  | 0.000 | 0.042 | 0.958 |          |          |          | 37/2065                      | 0   | 37  | 1014 | 0.000 | 0.035 | 0.965 |          |          |          | 0.246            | 0.6200 | 1.19 |
| 98/428                    | 11  | 68  | 180  | 0.042 | 0.263 | 0.695 | 0.042    | 0.263    | 0.695    | 452/1636                     | 49  | 354 | 641  | 0.047 | 0.339 | 0.614 | 0.047    | 0.339    | 0.614    | 4.800            | 0.0320 | 0.76 |
| 215/315                   | 43  | 129 | 93   | 0.162 | 0.487 | 0.351 | 0.162    | 0.487    | 0.351    | 826/1270                     | 1   |     |      |       |       |       |          |          |          |                  |        |      |

|     |              |          |   |   |        |    |    |    |       |       |       |         |    |     |     |       |       |       |        |        |      |
|-----|--------------|----------|---|---|--------|----|----|----|-------|-------|-------|---------|----|-----|-----|-------|-------|-------|--------|--------|------|
| OCD | 13 rs2020930 | 25590167 | T | C | 6/152  | 0  | 6  | 73 | 0.000 | 0.076 | 0.924 | 31/623  | 1  | 29  | 297 | 0.003 | 0.089 | 0.908 | 0.26   | 0.7930 | 0.79 |
| OCD | 14 rs7214981 | 25596486 | G | A | 57/99  | 10 | 37 | 31 | 0.128 | 0.474 | 0.397 | 223/429 | 41 | 141 | 144 | 0.126 | 0.433 | 0.442 | 0.3033 | 0.6223 | 1.11 |
| OCD | 15 rs1050565 | 25600202 | C | T | 48/104 | 7  | 34 | 35 | 0.092 | 0.447 | 0.461 | 184/464 | 29 | 126 | 169 | 0.090 | 0.389 | 0.522 | 0.6062 | 0.6445 | 1.16 |

|      | SNP               | BP        | NMISS | BETA      | SE      | R2         | T       | P      | STAT    | EMP1   | EMP2   |                                                                         |
|------|-------------------|-----------|-------|-----------|---------|------------|---------|--------|---------|--------|--------|-------------------------------------------------------------------------|
| EPON | 1 rs28914832      | 2562500   | 2650  | 0.2304    | 0.4097  | 0.0001194  | 0.5623  | 0.5740 | 0.32    | 0.5846 | 1      | CHR Chromosome number                                                   |
| EPON | 2 rs140700        | 2562515   | 2650  | -0.03985  | 0.06193 | 1.90E-04   | -0.6436 | 0.5199 | 0.41    | 0.5190 | 0.9994 | SNP SNP identifier                                                      |
| EPON | 3 rs6355          | 2562526   | 2649  | 0.09681   | 0.1259  | 2.23E-04   | 0.7686  | 0.4422 | 0.59    | 0.4421 | 0.9959 | BP Physical position (base-pair)                                        |
| EPON | 4 rs6354          | 2562526   | 2632  | -0.1085   | 0.04643 | 0.002071   | -2.336  | 0.0195 | 5.46    | 0.0187 | 0.1913 | NMISS Number of non-missing genotypes                                   |
| EPON | 5 rs2020939       | 2562526   | 2646  | 0.03207   | 0.03808 | 2.68E-04   | 0.8419  | 0.3999 | 0.71    | 0.3984 | 0.9914 | BETA Regression coefficient                                             |
| EPON | 6 rs2020936       | 2562526   | 2647  | -0.1127   | 0.04658 | 0.002208   | -2.419  | 0.0156 | 5.85    | 0.0149 | 0.1586 | SE Standard error                                                       |
| EPON | 7 rs2066713       | 25625791  | 2647  | 0.03555   | 0.03823 | 0.0003269  | 0.93    | 0.3525 | 0.86    | 0.3489 | 0.9812 | R2 Regression r-squared                                                 |
| EPON | 8 rs4251417       | 256257984 | 2620  | 0.123     | 0.06529 | 0.001354   | 1.884   | 0.0596 | 3.55    | 0.0654 | 0.4886 | T Wald test (based on t-distribution)                                   |
| EPON | 9 rs2020935       | 25655581  | 2644  | -0.08802  | 0.07763 | 0.0006032  | -1.263  | 0.2068 | 1.60    | 0.2038 | 0.8916 | P Wald test asymptotic p-value                                          |
| EPON | 10 rs2020934      | 25655586  | 2590  | 0.005651  | 0.0376  | 8.73E-06   | 0.1503  | 0.8805 | 0.02    | 0.8780 | 1      | EMP1 Empirical p-value from permutation testing single SNP analysis     |
| EPON | 11 HTTLPR         | 25656631  | 2583  | -0.03991  | 0.03749 | 0.000439   | -1.065  | 0.2871 | 1.13    | 0.2897 | 0.9577 | EMP2 Empirical p-value from permutation accounting for multiple testing |
| EPON | 12 SHTLPR-rs25531 | 25658472  | 2535  | 0.0583    | 0.03777 | 0.0009723  | 1.57    | 0.1165 | 2.47    | 0.1141 | 0.7056 | PLINK --assoc --perm output for quantitative traits                     |
| EPON | 13 rs2020930      | 25690167  | 2648  | -0.1314   | 0.1037  | 0.0006069  | -1.268  | 0.2050 | 1.61    | 0.2041 | 0.8901 |                                                                         |
| EPON | 14 rs7214991      | 25696486  | 2643  | -0.0257   | 0.03814 | 1.72E-04   | -0.6737 | 0.5006 | 0.45    | 0.5057 | 0.9991 |                                                                         |
| EPON | 15 rs1050565      | 25600202  | 2638  | -0.01097  | 0.03926 | 2.96E-05   | -0.2795 | 0.7799 | 0.08    | 0.7736 | 1      |                                                                         |
| EPQJ | 1 rs28914832      | 2562500   | 2641  | -0.1066   | 0.5077  | 1.87E-05   | -0.2099 | 0.83   | 0.04406 | 0.84   | 1      |                                                                         |
| EPQJ | 2 rs140700        | 2562515   | 2643  | 0.03917   | 0.05749 | 0.0001757  | 0.6813  | 0.50   | 0.4642  | 0.49   | 0.9987 |                                                                         |
| EPQJ | 3 rs6355          | 2562526   | 2641  | 0.05376   | 0.1169  | 8.01E-05   | 0.4599  | 0.65   | 0.2115  | 0.65   | 1      |                                                                         |
| EPQJ | 4 rs6354          | 2562526   | 2622  | 0.06738   | 0.04258 | 0.0009551  | 1.583   | 0.11   | 2.505   | 0.11   | 0.6936 |                                                                         |
| EPQJ | 5 rs2020939       | 2562526   | 2639  | -0.0927   | 0.03443 | 0.001122   | -1.721  | 0.09   | 2.963   | 0.09   | 0.586  |                                                                         |
| EPQJ | 6 rs2020936       | 2562526   | 2641  | 0.04085   | 0.04289 | 0.0003434  | 0.9521  | 0.34   | 0.9066  | 0.34   | 0.9815 |                                                                         |
| EPQJ | 7 rs2066713       | 25625791  | 2639  | 0.03143   | 0.03477 | 3.10E-04   | 0.8039  | 0.37   | 0.8171  | 0.37   | 0.9876 |                                                                         |
| EPQJ | 8 rs4251417       | 256257984 | 2620  | -0.1184   | 0.06103 | 0.001436   | -1.84   | 0.05   | 3.764   | 0.05   | 0.4198 |                                                                         |
| EPQJ | 9 rs2020935       | 25655581  | 2635  | 0.01268   | 0.07101 | 1.21E-05   | 0.1786  | 0.86   | 0.03191 | 0.86   | 1      |                                                                         |
| EPQJ | 10 rs2020934      | 25655586  | 2599  | 0.006238  | 0.03409 | 0.0001289  | 0.183   | 0.85   | 0.03348 | 0.85   | 1      |                                                                         |
| EPQJ | 11 HTTLPR         | 25656631  | 2579  | 0.02199   | 0.03422 | 0.0001602  | 0.6426  | 0.52   | 0.4129  | 0.52   | 0.9994 |                                                                         |
| EPQJ | 12 SHTLPR-rs25531 | 25658472  | 2527  | -0.02592  | 0.03423 | 0.0002269  | -0.7571 | 0.45   | 0.5732  | 0.46   | 0.9968 |                                                                         |
| EPQJ | 13 rs2020930      | 25690167  | 2639  | -0.01716  | 0.0927  | 1.30E-05   | -0.1851 | 0.85   | 0.03428 | 0.85   | 1      |                                                                         |
| EPQJ | 14 rs7214991      | 25696486  | 2636  | -0.004038 | 0.03484 | 6.13E-06   | -0.127  | 0.90   | 0.01614 | 0.89   | 1      |                                                                         |
| EPQJ | 15 rs1050565      | 25600202  | 2632  | -0.006112 | 0.03592 | 0.00001101 | -0.1702 | 0.86   | 0.02896 | 0.87   | 1      |                                                                         |
| HA   | 1 rs28914832      | 2562500   | 2643  | -0.1595   | 0.4317  | 5.17E-05   | -0.3698 | 0.71   | 0.1366  | 0.71   | 1      |                                                                         |
| HA   | 2 rs140700        | 2562515   | 2645  | -0.02719  | 0.05942 | 0.00007821 | -0.4576 | 0.65   | 0.2094  | 0.65   | 1      |                                                                         |
| HA   | 3 rs6355          | 2562526   | 2643  | -0.1439   | 0.1227  | 0.0005209  | -1.173  | 0.24   | 1.376   | 0.24   | 0.9257 |                                                                         |
| HA   | 4 rs6354          | 2562526   | 2624  | -0.04996  | 0.0444  | 0.0004825  | -1.125  | 0.26   | 1.266   | 0.26   | 0.9427 |                                                                         |
| HA   | 5 rs2020939       | 2562526   | 2642  | 0.04352   | 0.03605 | 5.62E-04   | 1.207   | 0.23   | 1.457   | 0.22   | 0.9121 |                                                                         |
| HA   | 6 rs2020936       | 2562526   | 2643  | -0.0406   | 0.04446 | 3.16E-04   | -0.913  | 0.36   | 0.8337  | 0.35   | 0.9869 |                                                                         |
| HA   | 7 rs2066713       | 25625791  | 2642  | -0.01941  | 0.03651 | 1.07E-04   | -0.5315 | 0.60   | 0.2825  | 0.58   | 0.9999 |                                                                         |
| HA   | 8 rs4251417       | 256257984 | 2615  | 0.1375    | 0.06311 | 0.001813   | 2.178   | 0.03   | 4.746   | 0.03   | 0.2644 |                                                                         |
| HA   | 9 rs2020935       | 25655581  | 2634  | -0.04983  | 0.07387 | 0.0001167  | -0.5442 | 0.58   | 0.3071  | 0.58   | 0.9999 |                                                                         |
| HA   | 10 rs2020934      | 25655586  | 2596  | 0.02317   | 0.03585 | 0.0001161  | 0.6462  | 0.52   | 0.4176  | 0.51   | 0.9993 |                                                                         |
| HA   | 11 HTTLPR         | 25656631  | 2580  | 0.005196  | 0.03566 | 8.24E-06   | 0.1457  | 0.88   | 0.02123 | 0.88   | 1      |                                                                         |
| HA   | 12 SHTLPR-rs25531 | 25658472  | 2535  | 0.01484   | 0.03569 | 6.83E-05   | 0.4158  | 0.68   | 0.1729  | 0.67   | 1      |                                                                         |
| HA   | 13 rs2020930      | 25690167  | 2641  | -0.07973  | 0.09672 | 0.0002574  | -0.8243 | 0.41   | 0.6795  | 0.41   | 0.9947 |                                                                         |
| HA   | 14 rs7214991      | 25696486  | 2638  | -0.02146  | 0.03638 | 0.0001319  | -0.5898 | 0.56   | 0.3478  | 0.56   | 0.9996 |                                                                         |
| HA   | 15 rs1050565      | 25600202  | 2632  | -0.004771 | 0.03735 | 0.00006204 | -0.1277 | 0.90   | 0.01632 | 0.90   | 1      |                                                                         |
